# Supplementary material
Source: Springer Nature journal article supplement (http://www.springermedizin.de/resource/supplementary/12943_2013_1202_MOESM3_ESM.pdf/9552368)

**A**

■ TRAIL only   □ API-1 only   ■ API-1+ TRAIL

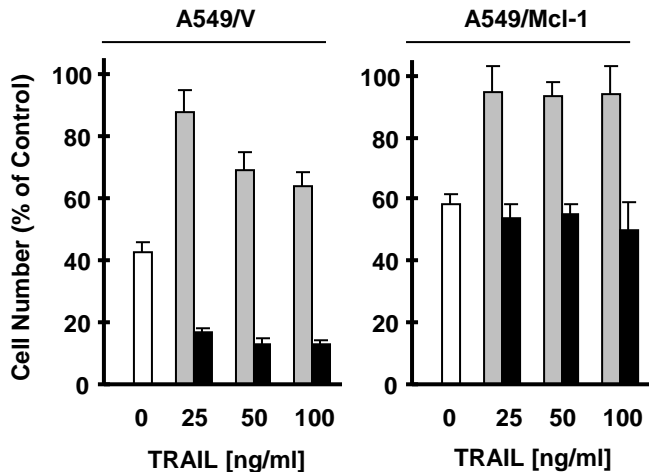**B**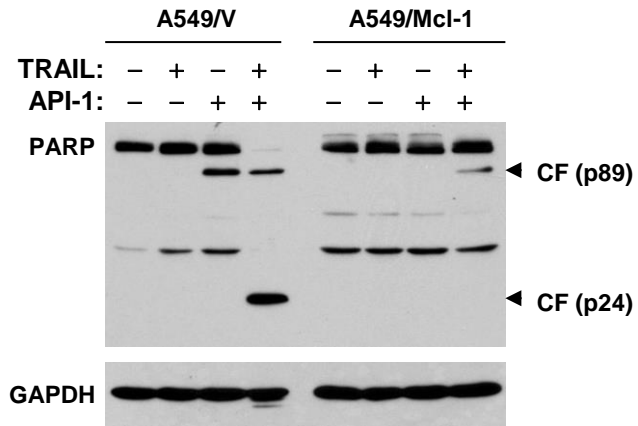

Supplement: MOESM3 [file 9552368]
